# Supplementary material
Source: PubMed Central journal article supplement (PMC5577558)
Supplement: NIHMS895722-supplement-Suppl_Mat.pdf [file NIHMS895722-supplement-Suppl_Mat.pdf]

## Supplementary Online Content

Romano MJ, Segal JB, Pollack CE. The association between continuity of care and the overuse of medical procedures [published online May 18, 2015]. *JAMA Intern Med*. doi:10.1001/jamainternmed.2015.1340.

eFigure 1. Derivation of analysis sample

eFigure 2. Formulae for calculating continuity metrics

eTable 1. Definitions of potentially overused procedures

eTable 2. Examples of continuity of care (COC) indices for patients with 13 total visits

eTable 3. Comparison of continuity metrics COC, UPC, and SECON for associations with overuse

This supplementary material has been provided by the authors to give readers additional information about their work.

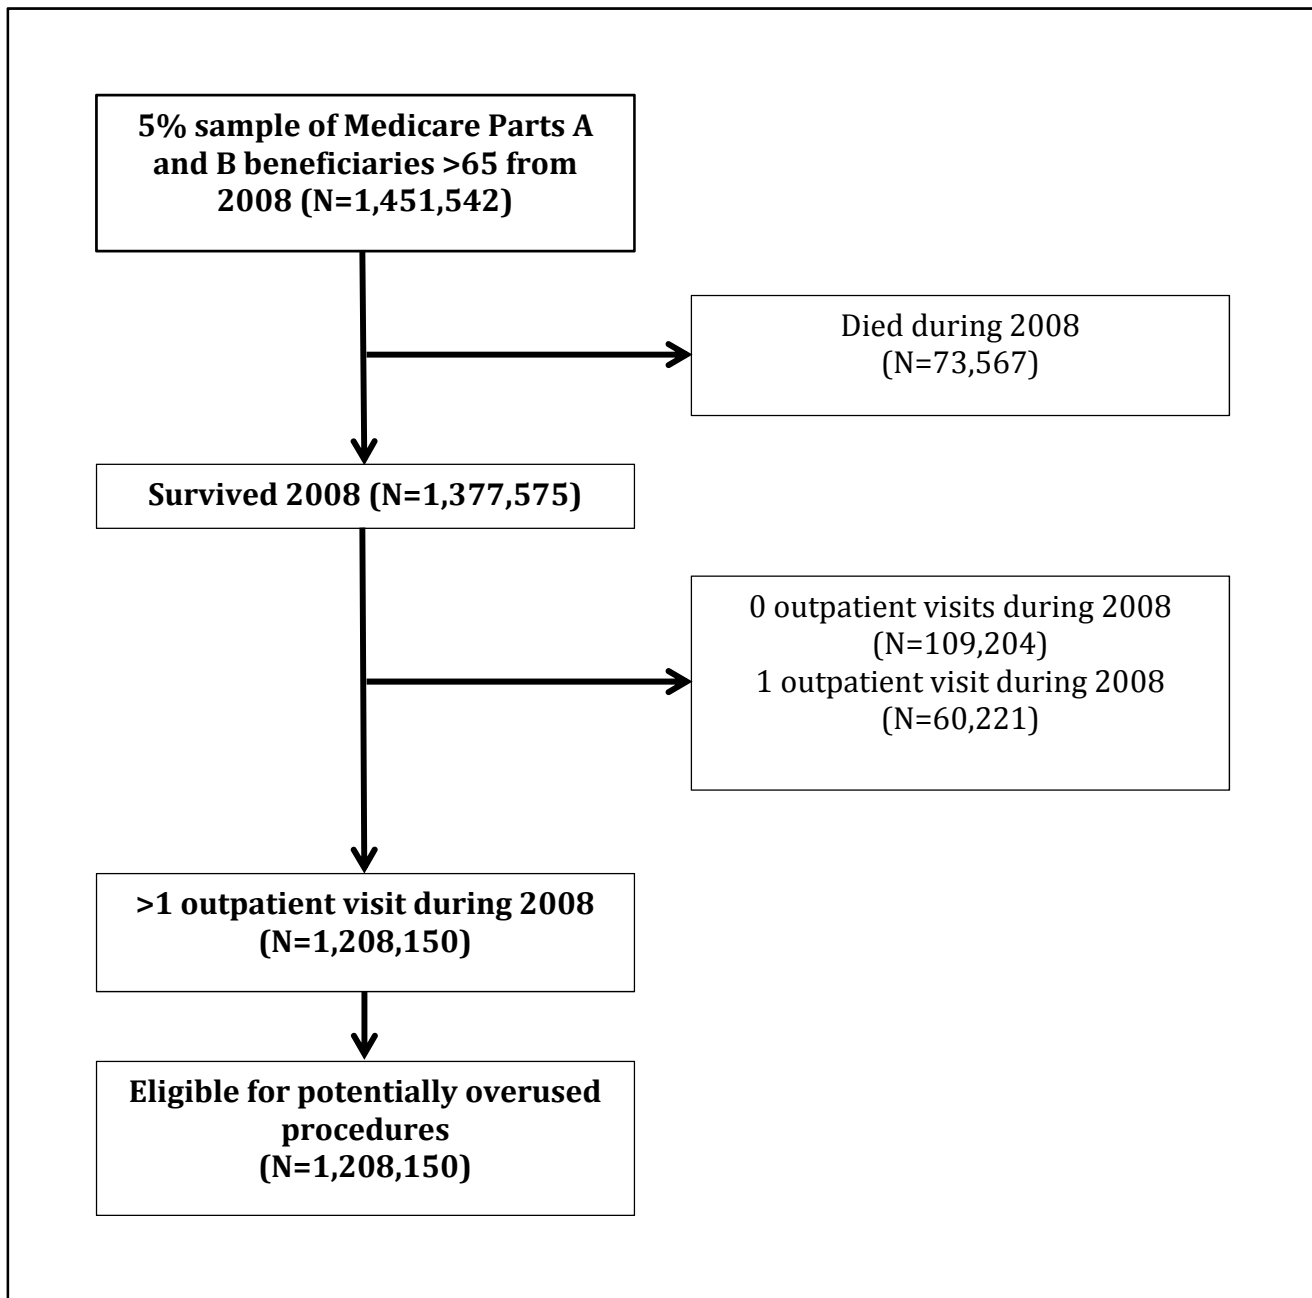

**eFigure 1.** Derivation of analysis sample

| Measure                                      | Formula                                   | Concept Represented                                                           |
|----------------------------------------------|-------------------------------------------|-------------------------------------------------------------------------------|
| Bice-Boxerman Continuity of Care Index (COC) | $\frac{(\sum_{i=1}^p n_i^2) - n}{n(n-1)}$ | Degree of coordination required between different providers during an episode |
| Usual Provider of Care (UPC)                 | $\max\left(\frac{n_i}{n}\right)$          | Concentration of care with a primary provider                                 |
| Sequential Continuity Index (SECON)          | $\frac{\sum_{j=1}^{n-1} c_j}{n-1}$        | Number of handoffs of information required between providers                  |

**eFigure 2.** Formulae for calculating continuity metrics<sup>1</sup>

**Legend:**  $p$  = total number of providers;  $n$  = total number of visits during episode;  $n_i$  = number of visits to provider  $i$ ;  $c_j$  = indicator of sequential visits to same providers, equal to 1 if visits  $j$  and  $j+1$  are to the same provider, 0 otherwise.

<sup>1</sup> Pollack CE, Hussey PS, Rudin RS, Fox DS, Lai J, Schneider EC. Measuring Care Continuity: A Comparison of Claims-based Methods. *Med Care*. 2013. [Epub ahead of print].

© 2015 American Medical Association. All rights reserved.

**eTable 1.** Definitions of potentially overused procedures

| <b>Procedure</b>                                                                                                                                                       | <b>Numerator Indications</b>                                                                                                                                                       | <b>Denominator Indications</b>                                                                                                                                     |
|------------------------------------------------------------------------------------------------------------------------------------------------------------------------|------------------------------------------------------------------------------------------------------------------------------------------------------------------------------------|--------------------------------------------------------------------------------------------------------------------------------------------------------------------|
| <b>Diagnostic Tests</b>                                                                                                                                                |                                                                                                                                                                                    |                                                                                                                                                                    |
| Fiberoptic laryngoscopy for patients with a diagnosis of sinusitis                                                                                                     | Laryngoscopy with ICD-9 code indicating sinusitis on the same claim                                                                                                                | Individuals with a diagnosis of sinusitis (acute or chronic)                                                                                                       |
| Nasal endoscopy for sinusitis diagnosis                                                                                                                                | Nasal endoscopy with ICD-9 code indicating sinusitis on the same claim                                                                                                             | Individual with a diagnosis of sinusitis (acute or chronic)                                                                                                        |
| EEG monitoring in individuals presenting with syncope                                                                                                                  | EEG on the same claim as diagnosis of syncope or at any time during the hospitalization with a code for syncope                                                                    | Individuals with an outpatient visit with diagnosis of syncope or hospitalization for syncope                                                                      |
| MRI in individuals with traumatic brain injury                                                                                                                         | MRI on the same claim as diagnosis of mild traumatic brain injury if outpatient or during hospitalization if inpatient within first 2 days                                         | Individuals with traumatic brain injury                                                                                                                            |
| Stress echocardiography for detection of coronary artery disease/risk assessment in symptomatic or ischemic equivalent acute chest pain (i.e. Acute Coronary Syndrome) | Individuals with stress echocardiography associated with an emergency room visit or hospitalization                                                                                | Individuals with a code for emergency visit or hospitalization with any of the symptomatic or ischemic equivalent acute chest pain primary or secondary diagnoses  |
| Sinus CT or indiscriminate antibiotics for uncomplicated acute rhinosinusitis                                                                                          | Any occurrence of sinus CT in the 3 months preceding the diagnosis of acute sinusitis                                                                                              | Individuals with acute sinusitis without a diagnosis of acute or chronic sinusitis in the prior 3 months                                                           |
| Unproven diagnostic tests, such as immunoglobulin G (IgG) testing or an indiscriminate battery of Immunoglobulin E (IgE) tests, in the evaluation of allergy           | Use of unproven tests on the same claim as a code for diagnoses in the denominator column                                                                                          | Individuals with allergic rhinitis, asthma, or other allergies                                                                                                     |
| Tumor marker studies in asymptomatic women with previously treated breast cancer                                                                                       | CEA, CA 15-3 (CA 27.29) testing                                                                                                                                                    | Individuals with previously treated breast cancer                                                                                                                  |
| Abdomen CT with and without contrast material                                                                                                                          | The number of abdomen CT studies with and without contrast ("combined studies")                                                                                                    | Individuals with abdomen CT studies performed (with contrast, without contrast, or both with and without contrast) excluding neoplastic or genitourinary diagnoses |
| MRI lumbar spine for low back pain                                                                                                                                     | MRI of the lumbar spine studies with a diagnosis of low back pain (from the denominator) without the patient having claims-based evidence of prior antecedent conservative therapy | Individuals with MRI of the lumbar spine with a diagnosis of low back pain on the imaging claim and no intra-spinal abscess                                        |
| PET, CT, and radionuclide bone scans in individuals with low-risk prostate cancer                                                                                      | PE, CT, or radionuclide bone scan after diagnosis of prostate cancer                                                                                                               | Men with low-risk prostate cancer excluding intermediate/high risk of recurrence                                                                                   |
| Preoperative chest radiography in the absence of a clinical suspicion for                                                                                              | Chest radiography in a 30-day window before the anesthesia code.                                                                                                                   | Individuals who had anesthesia with exclusion of intra-thoracic concerns                                                                                           |

© 2015 American Medical Association. All rights reserved.

|                                                                                          |                                                                                |                                                                                                             |
|------------------------------------------------------------------------------------------|--------------------------------------------------------------------------------|-------------------------------------------------------------------------------------------------------------|
| intra-thoracic pathology                                                                 |                                                                                |                                                                                                             |
| Thorax CT with and without contrast material                                             | The number of thorax CT studies with and without contrast ("combined studies") | All individuals with thorax CT studies (with contrast, without contrast, or both with and without contrast) |
| <b>Therapeutic Procedures</b>                                                            |                                                                                |                                                                                                             |
| Laminectomy and/or spinal fusion                                                         | Laminectomy or spinal fusion                                                   | All individuals minus those with a clear indication of herniated disc (i.e. radicular symptoms)             |
| Hysterectomy for benign disease                                                          | Any hysterectomy not specified for malignancy treatment                        | All women minus those with a malignancy diagnosis                                                           |
| Traction for low back pain                                                               | Traction with diagnosis of low back pain                                       | Individuals with low back pain diagnosis                                                                    |
| <b>Screening Tests</b>                                                                   |                                                                                |                                                                                                             |
| Screening for asymptomatic carotid artery stenosis (CAS) in the general adult population | CAS screening in outpatient setting (not emergency room)                       | Individuals with no symptoms of CAS                                                                         |
| Serological tests for helicobacter (H.) pylori                                           | Any code indicating testing for H. pylori                                      | Whole population                                                                                            |
| <b>Monitoring Tests</b>                                                                  |                                                                                |                                                                                                             |
| Routine monitoring of digoxin in patients with congestive heart failure                  | Any measure of digoxin with no hospitalizations or ER visits during that year  | Individuals with CHF and/or atrial fibrillation                                                             |

**Legend:** Computed Tomography, CT; Electro-encephalography, EEG; Magnetic Resonance Imaging, MRI; Positron Emission Tomography, PET

**eTable 2.** Examples of Continuity of Care (COC) Indices for Patients with 13 Total Visits

| No. of Visits | No. of Doctors | Visits to Dr. A | Visits to Dr. B | Visits to Dr. C | Visits to Dr. D | Visits to Dr. E | Visits to Dr. F | Visits to Dr. G | Visits to Dr. H | Visits to Dr. I | Visits to Dr. J | Visits to Dr. K | Visits to Dr. L | Visits to Dr. M | COC Index |
|---------------|----------------|-----------------|-----------------|-----------------|-----------------|-----------------|-----------------|-----------------|-----------------|-----------------|-----------------|-----------------|-----------------|-----------------|-----------|
| 13            | 1              | 13              |                 |                 |                 |                 |                 |                 |                 |                 |                 |                 |                 |                 | 1         |
| 13            | 2              | 12              | 1               |                 |                 |                 |                 |                 |                 |                 |                 |                 |                 |                 | 0.85      |
| 13            | 2              | 11              | 2               |                 |                 |                 |                 |                 |                 |                 |                 |                 |                 |                 | 0.72      |
| 13            | 3              | 11              | 1               | 1               |                 |                 |                 |                 |                 |                 |                 |                 |                 |                 | 0.71      |
| 13            | 2              | 10              | 3               |                 |                 |                 |                 |                 |                 |                 |                 |                 |                 |                 | 0.62      |
| 13            | 3              | 10              | 2               | 1               |                 |                 |                 |                 |                 |                 |                 |                 |                 |                 | 0.59      |
| 13            | 4              | 10              | 1               | 1               | 1               |                 |                 |                 |                 |                 |                 |                 |                 |                 | 0.58      |
| 13            | 2              | 9               | 4               |                 |                 |                 |                 |                 |                 |                 |                 |                 |                 |                 | 0.54      |
| 13            | 3              | 9               | 3               | 1               |                 |                 |                 |                 |                 |                 |                 |                 |                 |                 | 0.50      |
| 13            | 2              | 8               | 5               |                 |                 |                 |                 |                 |                 |                 |                 |                 |                 |                 | 0.49      |
| 13            | 3              | 9               | 2               | 2               |                 |                 |                 |                 |                 |                 |                 |                 |                 |                 | 0.49      |
| 13            | 4              | 9               | 2               | 1               | 1               |                 |                 |                 |                 |                 |                 |                 |                 |                 | 0.47      |
| 13            | 2              | 7               | 6               |                 |                 |                 |                 |                 |                 |                 |                 |                 |                 |                 | 0.46      |
| 13            | 5              | 9               | 1               | 1               | 1               | 1               |                 |                 |                 |                 |                 |                 |                 |                 | 0.46      |
| 13            | 3              | 8               | 4               | 1               |                 |                 |                 |                 |                 |                 |                 |                 |                 |                 | 0.44      |
| 13            | 3              | 8               | 3               | 2               |                 |                 |                 |                 |                 |                 |                 |                 |                 |                 | 0.41      |
| 13            | 4              | 8               | 3               | 1               | 1               |                 |                 |                 |                 |                 |                 |                 |                 |                 | 0.40      |



|    |   |   |   |   |   |   |   |   |   |   |  |  |  |  |  |  |  |      |
|----|---|---|---|---|---|---|---|---|---|---|--|--|--|--|--|--|--|------|
| 13 | 5 | 5 | 4 | 2 | 1 | 1 |   |   |   |   |  |  |  |  |  |  |  | 0.22 |
| 13 | 4 | 5 | 3 | 3 | 2 |   |   |   |   |   |  |  |  |  |  |  |  | 0.22 |
| 13 | 7 | 6 | 2 | 1 | 1 | 1 | 1 | 1 |   |   |  |  |  |  |  |  |  | 0.21 |
| 13 | 6 | 5 | 4 | 1 | 1 | 1 | 1 |   |   |   |  |  |  |  |  |  |  | 0.21 |
| 13 | 5 | 5 | 3 | 3 | 1 | 1 |   |   |   |   |  |  |  |  |  |  |  | 0.21 |
| 13 | 4 | 4 | 4 | 3 | 2 |   |   |   |   |   |  |  |  |  |  |  |  | 0.21 |
| 13 | 8 | 6 | 1 | 1 | 1 | 1 | 1 | 1 | 1 |   |  |  |  |  |  |  |  | 0.19 |
| 13 | 5 | 5 | 3 | 2 | 2 | 1 |   |   |   |   |  |  |  |  |  |  |  | 0.19 |
| 13 | 5 | 4 | 4 | 3 | 1 | 1 |   |   |   |   |  |  |  |  |  |  |  | 0.19 |
| 13 | 4 | 4 | 3 | 3 | 3 |   |   |   |   |   |  |  |  |  |  |  |  | 0.19 |
| 13 | 6 | 5 | 3 | 2 | 1 | 1 | 1 |   |   |   |  |  |  |  |  |  |  | 0.18 |
| 13 | 5 | 5 | 2 | 2 | 2 | 2 |   |   |   |   |  |  |  |  |  |  |  | 0.18 |
| 13 | 5 | 4 | 4 | 2 | 2 | 1 |   |   |   |   |  |  |  |  |  |  |  | 0.18 |
| 13 | 7 | 5 | 3 | 1 | 1 | 1 | 1 | 1 |   |   |  |  |  |  |  |  |  | 0.17 |
| 13 | 6 | 5 | 2 | 2 | 2 | 1 | 1 |   |   |   |  |  |  |  |  |  |  | 0.17 |
| 13 | 6 | 4 | 4 | 2 | 1 | 1 | 1 |   |   |   |  |  |  |  |  |  |  | 0.17 |
| 13 | 5 | 4 | 3 | 3 | 2 | 1 |   |   |   |   |  |  |  |  |  |  |  | 0.17 |
| 13 | 7 | 5 | 2 | 2 | 1 | 1 | 1 | 1 |   |   |  |  |  |  |  |  |  | 0.15 |
| 13 | 7 | 4 | 4 | 1 | 1 | 1 | 1 | 1 |   |   |  |  |  |  |  |  |  | 0.15 |
| 13 | 6 | 4 | 3 | 3 | 1 | 1 | 1 |   |   |   |  |  |  |  |  |  |  | 0.15 |
| 13 | 5 | 4 | 3 | 2 | 2 | 2 |   |   |   |   |  |  |  |  |  |  |  | 0.15 |
| 13 | 5 | 3 | 3 | 3 | 3 | 1 |   |   |   |   |  |  |  |  |  |  |  | 0.15 |
| 13 | 8 | 5 | 2 | 1 | 1 | 1 | 1 | 1 | 1 |   |  |  |  |  |  |  |  | 0.14 |
| 13 | 6 | 4 | 3 | 2 | 2 | 1 | 1 |   |   |   |  |  |  |  |  |  |  | 0.14 |
| 13 | 5 | 3 | 3 | 3 | 2 | 2 |   |   |   |   |  |  |  |  |  |  |  | 0.14 |
| 13 | 9 | 5 | 1 | 1 | 1 | 1 | 1 | 1 | 1 | 1 |  |  |  |  |  |  |  | 0.13 |
| 13 | 7 | 4 | 3 | 2 | 1 | 1 | 1 | 1 |   |   |  |  |  |  |  |  |  | 0.13 |

© 2015 American Medical Association. All rights reserved.



|    |    |   |   |   |   |   |   |   |   |   |   |   |   |   |   |   |      |
|----|----|---|---|---|---|---|---|---|---|---|---|---|---|---|---|---|------|
| 13 | 6  | 4 | 2 | 2 | 2 | 2 | 1 |   |   |   |   |   |   |   |   |   | 0.13 |
| 13 | 6  | 3 | 3 | 3 | 2 | 1 | 1 |   |   |   |   |   |   |   |   |   | 0.13 |
| 13 | 8  | 4 | 3 | 1 | 1 | 1 | 1 | 1 | 1 |   |   |   |   |   |   |   | 0.12 |
| 13 | 7  | 4 | 2 | 2 | 2 | 1 | 1 | 1 |   |   |   |   |   |   |   |   | 0.12 |
| 13 | 7  | 3 | 3 | 3 | 1 | 1 | 1 | 1 |   |   |   |   |   |   |   |   | 0.12 |
| 13 | 6  | 3 | 3 | 2 | 2 | 2 | 1 |   |   |   |   |   |   |   |   |   | 0.12 |
| 13 | 8  | 4 | 2 | 2 | 1 | 1 | 1 | 1 | 1 |   |   |   |   |   |   |   | 0.10 |
| 13 | 7  | 3 | 3 | 2 | 2 | 1 | 1 | 1 |   |   |   |   |   |   |   |   | 0.10 |
| 13 | 6  | 3 | 2 | 2 | 2 | 2 | 2 |   |   |   |   |   |   |   |   |   | 0.10 |
| 13 | 9  | 4 | 2 | 1 | 1 | 1 | 1 | 1 | 1 | 1 |   |   |   |   |   |   | 0.09 |
| 13 | 8  | 3 | 3 | 2 | 1 | 1 | 1 | 1 | 1 | 1 |   |   |   |   |   |   | 0.09 |
| 13 | 7  | 3 | 2 | 2 | 2 | 2 | 1 | 1 |   |   |   |   |   |   |   |   | 0.09 |
| 13 | 10 | 4 | 1 | 1 | 1 | 1 | 1 | 1 | 1 | 1 | 1 |   |   |   |   |   | 0.08 |
| 13 | 9  | 3 | 3 | 1 | 1 | 1 | 1 | 1 | 1 | 1 | 1 |   |   |   |   |   | 0.08 |
| 13 | 8  | 3 | 2 | 2 | 2 | 1 | 1 | 1 | 1 |   |   |   |   |   |   |   | 0.08 |
| 13 | 7  | 2 | 2 | 2 | 2 | 2 | 2 | 1 |   |   |   |   |   |   |   |   | 0.08 |
| 13 | 9  | 3 | 2 | 2 | 1 | 1 | 1 | 1 | 1 | 1 | 1 |   |   |   |   |   | 0.06 |
| 13 | 8  | 2 | 2 | 2 | 2 | 2 | 1 | 1 | 1 |   |   |   |   |   |   |   | 0.06 |
| 13 | 10 | 3 | 2 | 1 | 1 | 1 | 1 | 1 | 1 | 1 | 1 | 1 |   |   |   |   | 0.05 |
| 13 | 9  | 2 | 2 | 2 | 2 | 1 | 1 | 1 | 1 | 1 | 1 |   |   |   |   |   | 0.05 |
| 13 | 11 | 3 | 1 | 1 | 1 | 1 | 1 | 1 | 1 | 1 | 1 | 1 | 1 |   |   |   | 0.04 |
| 13 | 10 | 2 | 2 | 2 | 1 | 1 | 1 | 1 | 1 | 1 | 1 | 1 |   |   |   |   | 0.04 |
| 13 | 11 | 2 | 2 | 1 | 1 | 1 | 1 | 1 | 1 | 1 | 1 | 1 | 1 |   |   |   | 0.03 |
| 13 | 12 | 2 | 1 | 1 | 1 | 1 | 1 | 1 | 1 | 1 | 1 | 1 | 1 | 1 |   |   | 0.01 |
| 13 | 13 | 1 | 1 | 1 | 1 | 1 | 1 | 1 | 1 | 1 | 1 | 1 | 1 | 1 | 1 | 1 | 0.00 |

© 2015 American Medical Association. All rights reserved.

**eTable 3:** Comparison of continuity metrics COC, UPC, and SECON for associations with overuse

| Procedure                                          | Adjusted Odds Ratio for COC (95%CI*) | Adjusted Odds Ratio for UPC (95%CI*) | Adjusted Odds Ratio for SECON (95%CI*) | Adjusted odds ratio for COC in preceding 6 months (95% CI)** | Adjusted odds ratio with Primary Care Provider as covariate (95% CI*) |
|----------------------------------------------------|--------------------------------------|--------------------------------------|----------------------------------------|--------------------------------------------------------------|-----------------------------------------------------------------------|
| <b>Diagnostic Tests</b>                            |                                      |                                      |                                        |                                                              |                                                                       |
| Laryngoscopy for sinusitis                         | 0.84 (0.80; 0.88)*                   | 0.82 (0.80; 0.85)*                   | 0.91 (0.89; 0.94)*                     | 0.95 (0.90; 1.00)*                                           | 0.84 (0.80; 0.88)*                                                    |
| Nasal endoscopy for sinusitis                      | 0.84 (0.82; 0.87)*                   | 0.84 (0.83; 0.85)*                   | 0.90 (0.89; 0.91)*                     | 0.96 (0.93; 0.98)*                                           | 0.84 (0.82; 0.86)*                                                    |
| Electroencephalogram in syncope                    | 0.88 (0.86; 0.91)*                   | 0.90 (0.89; 0.92)*                   | 0.96 (0.94; 0.97)*                     | 1.02 (0.99; 1.04)                                            | 0.88 (0.86; 0.90)*                                                    |
| Stress echocardiography for acute chest pain       | 0.94 (0.90; 0.99)*                   | 0.95 (0.92; 0.98)*                   | 0.95 (0.93; 0.98)*                     | 1.00 (0.94; 1.05)                                            | 0.94 (0.90; 0.99)*                                                    |
| MRI in mild traumatic brain injury                 | 0.94 (0.90; 0.99)*                   | 0.95 (0.92; 0.98)*                   | 0.97 (0.95; 1.00)                      | 1.02 (0.97; 1.07)                                            | 0.94 (0.90; 0.99)*                                                    |
| Sinus CT or antibiotics for rhinosinusitis         | 0.96 (0.92; 1.01)                    | 0.97 (0.95; 1.00)                    | 0.99 (0.97; 1.02)                      | 1.00 (0.96; 1.06)                                            | 0.96 (0.92; 1.00)                                                     |
| Unproven allergy tests                             | 0.97 (0.94; 1.00)                    | 0.94 (0.92; 0.96)*                   | 1.01 (0.99; 1.03)                      | 0.99 (0.95; 1.02)                                            | 0.97 (0.94; 1.00)                                                     |
| Tumor marker studies in asymptomatic breast cancer | 0.99 (0.97; 1.00)                    | 0.95 (0.94; 0.96)*                   | 0.97 (0.96; 0.98)*                     | 1.00 (0.99; 1.02)                                            | 0.98 (0.97; 1.00)                                                     |
| Abdomen CT with and without contrast               | 0.99 (0.98; 1.00)*                   | 0.97 (0.97; 0.98)*                   | 1.00 (0.99; 1.00)                      | 0.99 (0.98; 1.00)                                            | 0.99 (0.98; 1.00)*                                                    |
| MRI lumbar spine for low back pain                 | 1.00 (0.98; 1.01)                    | 1.05 (1.03; 1.06)*                   | 1.00 (0.99; 1.01)                      | 1.00 (0.98; 1.02)                                            | 0.99 (0.98; 1.01)                                                     |
| Advanced imaging in low-risk prostate cancer       | 1.00 (0.98; 1.02)                    | 0.96 (0.95; 0.97)*                   | 1.05 (1.04; 1.06)*                     | 1.05 (1.03; 1.07)*                                           | 1.00 (0.98; 1.01)                                                     |
| Preoperative chest radiograph                      | 1.01 (1.00; 1.02)                    | 1.00 (0.99; 1.00)                    | 1.04 (1.04; 1.05)*                     | 1.04 (1.04; 1.05)*                                           | 1.01 (1.00; 1.02)                                                     |
| Thorax CT with and without contrast                | 1.06 (1.05; 1.08)*                   | 1.06 (1.05; 1.07)*                   | 1.06 (1.05; 1.07)*                     | 1.04 (1.02; 1.06)*                                           | 1.06 (1.04; 1.08)*                                                    |
| <b>Therapeutic Procedures</b>                      |                                      |                                      |                                        |                                                              |                                                                       |
| Laminectomy and/or spinal fusion                   | 0.81 (0.78; 0.85)*                   | 0.82 (0.80; 0.84)*                   | 0.91 (0.89; 0.93)*                     | 0.93 (0.89; 0.97)*                                           | 0.81 (0.78; 0.84)*                                                    |
| Hysterectomy for benign disease                    | 0.86 (0.82; 0.89)*                   | 0.86 (0.83; 0.88)*                   | 0.91 (0.89; 0.93)*                     | 0.95 (0.91; 1.00)                                            | 0.86 (0.82; 0.89)*                                                    |
| Traction for low back pain                         | 0.87 (0.86; 0.88)*                   | 0.85 (0.85; 0.86)*                   | 0.92 (0.92; 0.93)*                     | 0.95 (0.94; 0.95)*                                           | 0.87 (0.86; 0.88)*                                                    |
| <b>Screening Tests</b>                             |                                      |                                      |                                        |                                                              |                                                                       |
| Carotid artery stenosis screening                  | 0.99 (0.98; 1.00)                    | 0.97 (0.96; 0.97)*                   | 1.00 (1.00; 1.01)                      | 1.01 (1.00; 1.03)*                                           | 0.99 (0.98; 1.00)                                                     |
| Serological tests for H. pylori                    | 1.05 (1.04; 1.06)*                   | 1.05 (1.04; 1.06)*                   | 1.05 (1.03; 1.06)*                     | 1.04 (1.03; 1.06)*                                           | 1.05 (1.04; 1.06)*                                                    |
| <b>Monitoring Test</b>                             |                                      |                                      |                                        |                                                              |                                                                       |
| Routine monitoring of digoxin                      | 1.03 (1.02; 1.04)*                   | 1.02 (1.02; 1.03)*                   | 1.00 (0.99; 1.01)                      | 1.03 (1.01; 1.04)*                                           | 1.03 (1.02; 1.04)*                                                    |
| <b>Any Overused Procedure</b>                      | 0.93 (0.93; 0.94)*                   | 0.90 (0.90; 0.90)*                   | 0.97 (0.97; 0.97)*                     | 0.99 (0.99; 1.00)*                                           | 0.93 (0.93; 0.94)                                                     |

\* Confidence intervals are adjusted for 19 multiple comparisons based on Holm-Bonferroni correction with overall alpha=0.05 for each overused procedure.

Confidence interval for "Any Overused Procedure" is not adjusted for multiple comparisons because it is a summative measure.

\*\* Adjusted odds ratio for overuse occurring during July to December 2008 based on continuity calculated using visits from January to June 2008

**Legend:** Bice-Boxerman Continuity of Care index, COC; Computed Tomography, CT; Magnetic Resonance Imaging, MRI; SEquential CONTinuity index, SECON; Usual Provider of Care index, UPC
